# Supplementary material for: Self-assembly of ultrathin mesoporous CoMoO4 nanosheet networks on flexible carbon fabric as a binder-free anode for lithium-ion batteries
Source: Royal Society of Chemistry journal article supplement (doi:10.1039/c5nj02910d), 2015-12-22
Supplement: c5nj02910d1.pdf [file c5nj02910d1.pdf]

Electronic Supplementary Material (ESI) for New Journal of Chemistry

## Supporting Information

Self-assembly of ultrathin mesoporous  $\text{CoMoO}_4$  nanosheets  
networks on flexible carbon fabric as a binder-free anode for  
lithium-ion batteries

Bo Wang, Songmei Li,\* Xiaoyu Wu, Jianhua Liu, Wenming Tian, and Jing Chen

Key Laboratory of Aerospace Advanced Materials and Performance of Ministry of  
Education, School of Materials Science and Engineering, Beihang University, Beijing,  
100191, P. R. China

\* Corresponding author. Tel: +86 10 82317103; fax: +86 10 82317103.

E-mail address: [songmei\\_li@buaa.edu.cn](mailto:songmei_li@buaa.edu.cn).

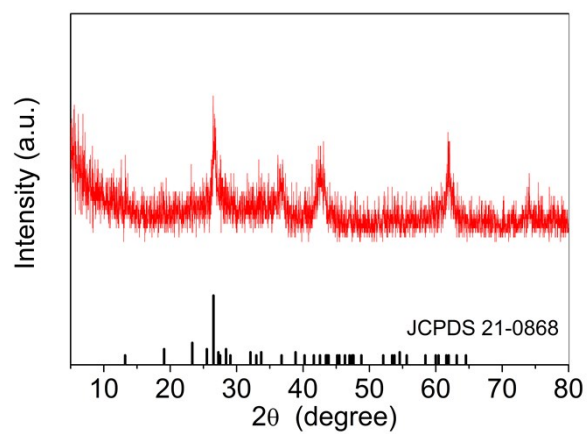

**Figure S1.** The typical XRD pattern of  $\text{CoMoO}_4$  powders.

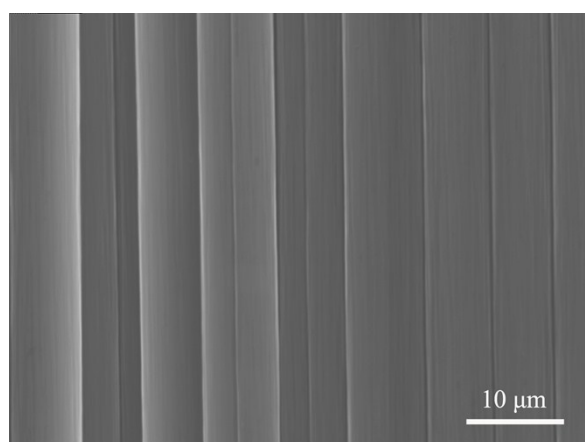

**Figure S2.** SEM images of the carbon fabric.

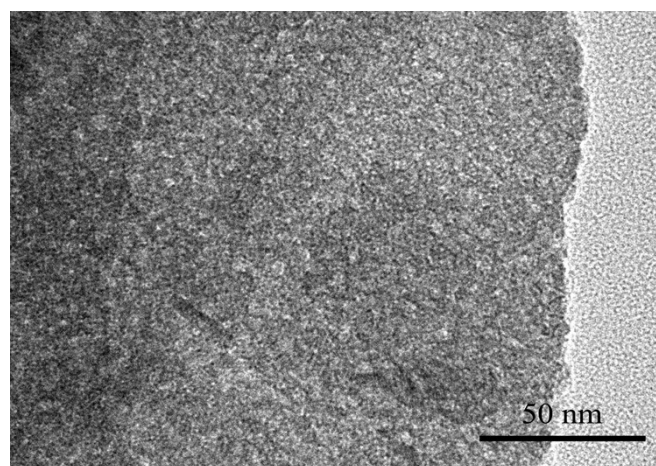

**Figure S3.** The higher magnification TEM image of the  $\text{CoMoO}_4$  nanosheets revealing the mesoporous feature.

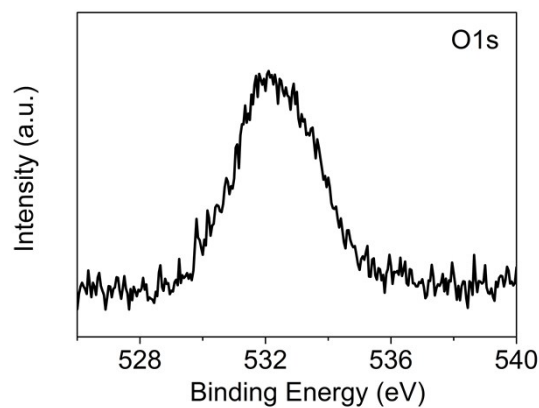

**Figure S4.** XPS spectra of O 1s for CoMoO<sub>4</sub>/carbon fabric composites.

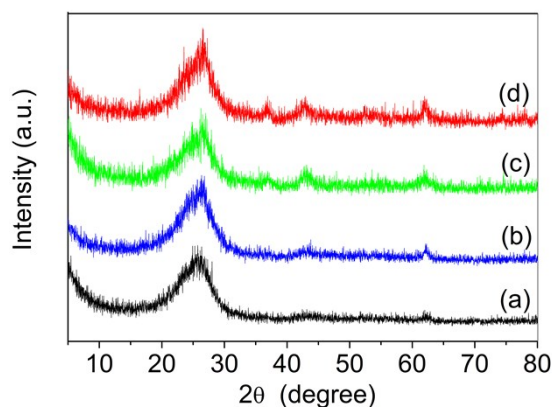

**Figure S5.** XRD patterns of CoMoO<sub>4</sub>/carbon fabric composites obtained at different hydrothermal growth times: (a) 0.5 h, (b) 2 h, (c) 4 h, and (d) 6 h.

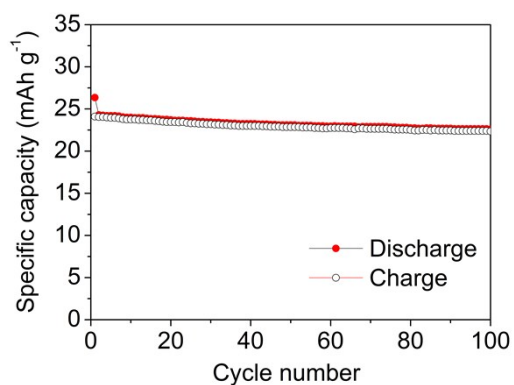

**Figure S6.** Cycling performance of carbon fabric at a current density of 200 mA g<sup>-1</sup>.
